1 **Title**

2 Blocking IL-10 signaling with soluble IL-10 receptor restores specific lymphoproliferative  
3 response in dogs with leishmaniasis caused by *Leishmania infantum*

4 **Authors**

5 Catiule de Oliveira Santos<sup>a</sup>, Sidnei Ferro Costa<sup>b</sup>, Fabiana Santana Souza<sup>a</sup>, Jessica Mariane Ferreira  
6 Mendes<sup>a</sup>, Cristiane Garboggini Melo de Pinheiro<sup>a</sup>, Diogo Rodrigo de Magalhães Moreira<sup>a</sup>,  
7 Luciano Kalabric Silva<sup>a</sup>, Valeria Marçal Felix de Lima<sup>b</sup>, Geraldo Gileno de Sá Oliveira<sup>a</sup>.

8 **Affiliation**

9 <sup>a</sup>Oswaldo Cruz Foundation, Gonçalo Moniz Research Center, Laboratory of Structural and  
10 Molecular Pathology (LAPEM), Tissue Engineering and Immunopharmacology Laboratory (LETI)  
11 or Pathology and Molecular Biology Laboratory (LPBM), Rua Waldemar Falcão, No. 121, Candeal,  
12 Salvador, Brazil.

13 <sup>b</sup>Department of Clinical Medicine, Surgery and Animal Reproduction, São Paulo State University  
14 (UNESP), School of Veterinary Medicine, Araçatuba, Brazil.

15

16 **\*Corresponding Author:**

17 Email: [ggileno@bahia.fiocruz.br](mailto:ggileno@bahia.fiocruz.br); [ggsoliveir@gmail.com](mailto:ggsoliveir@gmail.com)

18 **Key words**

19 Recombinant soluble interleukin 10 receptor, dog, leishmaniasis, lymphoproliferation

20

21 **Abstract**

22 rIL-10 plays a major role in restricting exaggerated inflammatory and immune  
23 responses, thus preventing tissue damage. However, the restriction of inflammatory and  
24 immune responses by IL-10 can also favor the development and/or persistence of chronic  
25 infections or neoplasms. Dogs that succumb to leishmaniasis caused by *L. infantum* (CanL)  
26 develop exhaustion of T lymphocytes and are unable to mount appropriate cellular immune  
27 responses to control the infection. These animals fail to mount specific lymphoproliferative  
28 responses and produce interferon gamma and TNF-alpha that would activate macrophages and  
29 promote destruction of intracellular parasites. Blocking IL-10 signaling may contribute to the  
30 treatment of CanL. In order to obtain a tool for this blockage, the present work endeavored to  
31 identify the canine casIL-10R1 amino acid sequence, generate a recombinant baculovirus  
32 chromosome encoding this molecule, which was expressed in insect cells and subsequently  
33 purified to obtain rcasIL-10R1. In addition, rcasIL-10R1 was able to bind to homologous IL-10

34 and block IL-10 signaling pathway, as well as to promote lymphoproliferation in dogs with  
35 leishmaniasis caused by *L. infantum*.

36

37

## 38 **1 Introduction**

39 Cytokines are polypeptides that participate in communication between cells and the  
40 orchestration of immune system responses. In response to tissue aggression and/or stimulation,  
41 these molecules may be secreted and bind to the extracellular domains of cognate receptors on  
42 target cells. This results in the phosphorylation of intracytoplasmic domains of cytokine  
43 receptors and activation of transcription factors, which migrate to the nucleus and implement  
44 cellular transcription and functions [1]. Some cytokines mainly promote pro-inflammatory  
45 activities, while others are anti-inflammatory or immunosuppressive in nature [2].  
46 Proinflammatory cytokines are predominantly produced by activated macrophages and  
47 lymphocytes, including interleukin-1 $\beta$  (IL-1 $\beta$ ), IL-6, tumor necrosis factor alpha (TNF- $\alpha$ ),  
48 granulocyte-macrophage colony stimulating factor (GM-CSF), interferon gamma (IFN- $\gamma$ ) and IL-  
49 12 [1, 2]. Anti-inflammatory cytokines are produced mainly by lymphocytes or non-classically  
50 activated macrophages, e.g. IL-4, IL-10, IL-11, IL-13 and TGF- $\beta$  [2-4].

51 IL-10, the most important anti-inflammatory and immunosuppressive cytokine, can be  
52 produced by a variety of immune cells, including CD4+ and CD8+ T cells, B lymphocytes, natural  
53 killer (NK) cells, monocytic and dendritic cells, as well as eosinophils and neutrophils [5, 6]. IL-10  
54 signaling occurs via a receptor consisting of two distinct polypeptide chains, subunits IL-10R $\alpha$   
55 (IL-10R1) and IL-10R $\beta$  (IL-10R2). Accordingly, IL-10 initially binds to the extracytoplasmic domain  
56 (ECD) of IL-10R1 with high affinity, followed by low affinity interactions with the IL-10R2 subunit  
57 by both IL-10 and IL-10R1 [7]. Next, JAK1 and TYK2 respectively interact with IL-10R1 and IL-  
58 10R2, become phosphorylated and mainly activate STAT3 [8], leading to the implementation of  
59 gene transcription programs and consequent cellular responses [5, 6, 8].

60 IL-10 can target several cells in the immune system and may exert a broad range of anti-  
61 inflammatory and immunosuppressive activities on these cells. As a result of high IL-10R  
62 expression, monocytes and macrophages are the main targets for the inhibitory effects of IL-10  
63 [9-11]. In these cells, IL-10 inhibits the transcription of cytokines and chemokines (IL-1 $\alpha$ , IL-1 $\beta$ ,  
64 IL-6, IL-10, IL-12, IL-18, GM-CSF, G-CSF, M-CSF, TNF- $\alpha$ , LIF and PAF) [12-15] and reduces antigen  
65 presentation by decreasing the expression of MHCII, accessory (CD86) and adhesion (CD54)  
66 molecules [16-18]. Although IL-10 increases phagocytic activity in macrophages [19, 20], it limits  
67 the production of superoxide anion (O $_2^-$ ) and nitric oxide (NO) in these cells, hampering the

68 elimination of phagocytosed microorganisms [21-23]. In addition, IL-10 also inhibits some T  
69 lymphocyte functions indirectly through decreased antigen presentation [24] and directly by  
70 inhibiting CD4 T cell proliferation and cytokine production (IL-2 and IFN- $\gamma$ ) [25, 26]. However, IL-  
71 10 exerts stimulatory effects over CD8<sup>+</sup> T cells, inducing recruitment, proliferation and cytotoxic  
72 activity [27-29].

73 Canine leishmaniasis (CanL) caused by *Leishmania infantum* (synonymous with *L.*  
74 *Chagasi* in the Americas) is a serious disease caused by the obligate intracellular protozoan [30,  
75 31]. Following natural inoculation with *L. infantum*, dogs may or may not develop disease [32].  
76 Those that are susceptible may present mild signs or even develop severe and fatal disease [32,  
77 33]. Dogs that develop the symptomatic form of leishmaniasis exhibit higher IL-10 and lower  
78 IFN- $\gamma$  concentrations in the blood, while the inverse is true in asymptomatic dogs [34, 35]. A  
79 positive correlation is evidenced between the expression of IL-10 and *L. infantum* parasitic load  
80 in the lymph nodes and spleens of infected canines. Under stimulation with leishmania antigens,  
81 susceptible animals exhibit an inability to mount a cellular immune response, as evidenced by  
82 the lack of lymphoproliferative response and cytokine production (IFN- $\gamma$  and TNF- $\alpha$ ), which  
83 stimulates microbicidal mechanisms in macrophages. The addition of IL-10 to cultures of  
84 peripheral blood mononuclear cells (PBMC) has been shown to inhibit the lymphoproliferative  
85 response to leishmania antigens [36].

86 The immunization of animals with antigens concomitantly with the blocking of IL-10  
87 signaling may favor the induction of a cellular immune response (Th1), even in the course of  
88 infection. This may represent a valid strategy in the development of preventive or therapeutic  
89 vaccines, as well as immunotherapeutic protocols, against canine diseases, including  
90 leishmaniasis caused by *L. infantum* [37-40].

91 The present work aimed to manipulate immune responses in dogs by producing  
92 recombinant casIL-10R1 (rcasIL-10R1) in a baculovirus-insect cell system, and evaluated this  
93 generated molecule's ability to bind to IL-10 inhibit signaling, and restore a lymphoproliferative  
94 response in dogs with leishmaniasis.

95

## 96 **2. Material and methods**

### 97 **2.1 DNA construct, recombinant baculovirus and protein expression**

98 Initially, the amino acid sequence of the extra-cytoplasmic domain of canine IL-10  
99 receptor alpha chain (R1) (so-called soluble canine IL-10 receptor, casIL-10R1) was identified.  
100 This was performed by comparing the amino acid sequences of human (huIL-10R1, GeneBank,  
101 accession number NM\_001558) and canine (caIL-10R1, Genbank accession number  
102 XM\_005620306.1) IL-10 receptor alpha chain, and huIL-10R1 [41] using Basic Local Align Search

103 Tool (BLAST, <https://blast.ncbi.nlm.nih.gov/Blast.cgi>), as well as defining transmembrane  
104 domains using an online tool <https://tmdas.bioinfo.se/DAS/>. After that, the DNA construct  
105 (*GP64-casIL-10R1-6H*) was designed to encode the following elements in tandem: a) *Autographa*  
106 *californica* multiple nuclear polyhedrosis virus (AcMNPV) GP64 leader sequence [42], b) casIL-  
107 10R1, and c) six histidines. Restriction endonuclease sites for *Sall* and *NotI* were added to the 5'  
108 and 3' ends, respectively, of the construct. The *GP64-casIL-10R1-6H* construct was synthesized  
109 using codons optimized for expression in insect cells, then cloned into a *pUC57-Kan* plasmid  
110 (GenScript, Piscataway, USA), generating the *pUC57-Kan-GP64-casIL-10R1-6H* construct. This  
111 DNA construct was then transferred into a *pFastBac1* plasmid after digestion with *Sall* and *NotI*  
112 and the use of T4 ligase, resulting in the *pFastBac1-GP64-casIL-10R1-6H* plasmid construct. Next,  
113 the DNA segment between Tn7R and Tn7L of *pFastBac1-GP64-casIL-10R1-6H* was transposed  
114 into a baculovirus artificial chromosome using *Escherichia coli* (DH10Bac-AcBac $\Delta$ CC), as  
115 previously described [43]. Recombinant bacmid (*AcBac $\Delta$ cc-GP64-casIL-10R1-6H*) was purified  
116 from *E. coli* and the presence of the insert was confirmed by PCR using primers (5'-  
117 *GTTTTCCAGTCACGAC* and 5'-*CAGGAAACAGCTATGAC*). This recombinant bacmid was used to  
118 generate viral stocks, which were titrated by limiting dilutions using Sf9 cells [43]. The  
119 optimization of recombinant protein expression (rcasIL10R1) was performed in High-Five cells  
120 and evaluated by dot-blotting as previously described [43].

121

## 122 **2.2 Recombinant protein production**

123 Rcas-IL10R1 was produced following a previously described method [43]. Briefly, High  
124 Five cells were cultured in Express-Five SFM medium supplemented with L-glutamine, grown to  
125 exponential phase, and then infected with the recombinant baculovirus (*AcBac $\Delta$ cc-GP64-casIL-*  
126 *10R1-6H*) with a multiplicity of infection (MOI) of 5 for 72 hours (TOI 72 h). The cell suspension  
127 was centrifuged at 3,000 x g for 15 minutes at 4 °C to remove cell debris, and the supernatant  
128 was spun down at 30,000 x g for 1 hour at 4 °C. The resulting supernatant was stored at -70 °C  
129 until use. For purification, the thawed supernatant was dialyzed against PBS with 30 mM  
130 imidazole, pH 7.2 (binding buffer) and applied to a Sepharose-Nickel column (HisTrap HP,  
131 General Eletrics Healthcare) equilibrated with binding buffer. A HisTrap column was eluted with  
132 PBS-500 mM imidazole, pH 7.2. After analysis by SDS-PAGE, the chromatographic fractions  
133 containing rcasIL-10R1 were pooled together, submitted to dialysis against PBS, aliquoted and  
134 stored at -70 °C until use. Protein concentrations were determined by Micro BCA (Thermo Fisher  
135 Scientific, Rockford, USA). Endotoxin concentration was determined using Limulus Amebocyte  
136 Lysate (Gel-clot Method, Pyrotell, USA) [44]. Purified recombinant protein was confirmed by  
137 Western blot assay using anti-his antibodies, as previously described [43].

138

### 139 **2.3 Binding of rcaIL-10R1 to IL-10**

140 Purified rcaIL-10R1 was immobilized on a CM5 chip (General Electrics, Uppsala,  
141 Sweden) in a Biacore T100 analyzer (General Electrics) in accordance with the manufacturer's  
142 recommendations. Briefly, 800  $\mu$ L of rcaIL-10R1 (0.5  $\mu$ g/mL) was applied (50  $\mu$ L/minute) to a  
143 chip matrix activated by 1-Ethyl-3-(3-dimethylaminopropyl) carbodiimide hydrochloride  
144 (EDC)/N-Hydroxysuccinimide (NHS) to achieve 1000 resonance response units (RU). The  
145 remaining reactive chemical groups on the chip were blocked by applying Ethanolamine  
146 hydrochloride-NaOH for one minute. Next, the following samples were applied to the matrix for  
147 two minutes and 30 seconds: a) phosphate buffered saline (PBS) containing 1% bovine serum  
148 albumin (BSA) and 0.05 % Tween 20; b) canine IL-4 (R&D Systems, Minneapolis, USA) at 125, 250  
149 or 500 ng/mL; c) canine IL-10 (R&D Systems) at 31.2, 62.5, 125, 250 or 500 ng/ml. IL-4 and IL-10  
150 were diluted with PBS containing 0.05% Tween 20. After each analyte binding evaluation, matrix  
151 regeneration was performed by applying regeneration buffer for 30 seconds. Each sample was  
152 evaluated twice and results are presented as means and standard deviations ( $X \pm SD$ ) of RU.  
153 Kinetics of association ( $K_{on}$ ) and dissociation ( $K_{off}$ ), as well as affinity of rcaIL-10R1 to IL-10,  
154 were calculated from RU measurements using Origin v.8.5 software (OriginLab Corporation,  
155 Northampton, USA).

156

### 157 **2.4 Murine mast cell (MC/9 cell) proliferation**

158 The murine mast cell line MC/9 (ATCC CRL-8306) was maintained by following the  
159 manufacturer's recommendations. MC/9 cell culturing was carried out in complete DMEM  
160 (Dulbecco's Modified Eagle's Medium supplemented with 10% fetal bovine serum (FBS), 2 mM  
161 L-glutamine, 0.05 mM 2-mercaptoethanol, sodium bicarbonate at 1.5 g/L and 10% of  
162 supernatant from concanavalin A (Con-A)-stimulated rat splenocytes). MC/9 cells were washed  
163 in DMEM and adjusted to  $2 \times 10^5$  cells/mL in complete DMEM. The cell suspension was placed  
164 in triplicate wells (50  $\mu$ L/well) on a 96-well flat-bottomed microtiter plate. One of the following  
165 solutions (50  $\mu$ L/well) containing complete DMEM was added to each well: a) complete DMEM  
166 alone (negative control); b) 1.25% of supernatant from Con-A-stimulated rat splenocytes (assay  
167 positive control), c) recombinant canine IL-4 (rcaIL-4, 360 ng/mL) (R&D Systems) , d)  
168 recombinant canine IL-10 (rcaIL-10, 40 ng/mL) (R&D Systems), e) rcaIL-4 (360 ng/mL) and rcaIL-  
169 10 (40 ng/mL), or f) rcaIL-4 (360 ng/mL), rcaIL-10 (40 ng/mL) and rcaIL-10R1 (8  $\mu$ g/mL). The  
170 plate was placed in a humidified atmosphere for 48 h under 5 % CO<sub>2</sub> at 37 °C. Then, 10  $\mu$ L of  
171 Alamar Blue (Invitrogen, Carlsbad, USA) were added to each well. Cells were cultured for an  
172 additional 24 hours and optical density (OD) was read at 570 nm and 600 nm wavelengths.

173 Differences in mean OD values were used to estimate MC/9 cell proliferation rates. Data analysis  
174 was performed using GraphPad Prism software (GraphPad Software, Inc., La Jolla, CA, USA)  
175 version 6.0.

176

## 177 **2.5 Animals**

178 This study was approved by the Brazilian Society of Science on Laboratory  
179 Animals/Brazilian College of Animal Experimentation (SBCAL/COBEA), and the Committee for  
180 Animal Care and Use – São Paulo State University (UNESP), protocol no. 00765-2017. The  
181 approved license covered the use of 5 healthy and 10 diseased dogs. A previous report  
182 characterized these animals, including clinical data [45]. Out of the 15 dogs, five were healthy  
183 (negative controls, two males and three females, two mongrels, one blue heeler, one cocker  
184 spaniel and one golden retriever) and 10 (CanL) were diagnosed with leishmaniasis (*Leishmania*  
185 *infantum*) (six males and four females, seven mongrels, two poodles and one blue heeler). All  
186 control dogs tested negative for *Leishmania* DNA by real-time PCR, and presented complete  
187 blood counts and mean serum biochemistry parameters within reference ranges [45]. The 10  
188 CanL dogs selected from the Araçatuba Zoonosis Control Center presented at least three of the  
189 following characteristic clinical signs of leishmaniasis: onychogryphosis, cachexia, ear-tip  
190 injuries, periocular lesions, alopecia, skin lesions or lymphadenopathy. *Leishmania* DNA was  
191 detected in the peripheral blood of each diseased dog by real-time PCR [45].

192

## 193 **2.6 Lymphoproliferation assay**

194 A lymphoproliferation assay was carried out as previously described [45]. Briefly,  
195 peripheral blood samples from both groups (controls and CanL) were collected in EDTA tubes.  
196 Peripheral blood mononuclear cells (PBMCs) were isolated by gradient centrifugation using  
197 Histopaque 1077 (Sigma, USA) according to the manufacturer's recommendations. Isolated cells  
198 were then washed in PBS (pH 7.2) and suspended in RPMI 1640 supplemented with inactivated  
199 10% FBS, 0.03% L-glutamine, 100 IU/mL penicillin and 100 mg/mL streptomycin. PBMCs were  
200 stained with carboxyfluorescein diacetate succinimidyl ester (2.5  $\mu$ M) (CFSE, CellTrace,  
201 Invitrogen, UK) for 10 min at 37 °C in accordance with manufacturer recommendations. Stained  
202 PBMCs were cultured on sterile 96-well plates ( $1 \times 10^6$ /mL) with one of the following solutions  
203 containing RPMI 1640 medium: a) RPMI 1640 medium alone (negative control), b) 20  $\mu$ g/mL of  
204 soluble leishmania antigens (SLA) (MHOM/BR/00/MERO2), c) rcasIL-10R1 (4  $\mu$ g/mL), d) rcasIL-  
205 10R1 in the presence of SLA (20  $\mu$ g/mL), e) phytohemagglutinin-M (PHA-M, 5  $\mu$ L/mL) (positive  
206 control). Plates were cultured for 5 days under 5% CO<sub>2</sub> at 37 °C. Events (10,000) were acquired  
207 on a flow cytometer (BD C5 Accuri Flow Cytometer, USA) and data analysis was performed using

208 BD Accuri C6 software, v. 1.0 (BD Biosciences, CA, USA). Cell populations of similar size and  
209 complexity as the lymphocyte population were gated and evaluated by positive CFSE labeling.

210

## 211 **2.6 Statistical analysis**

212 Statistical analysis was performed using GraphPad Prism v6 software (GraphPad  
213 Software, Inc., La Jolla, CA, USA). Statistical variables were tested for normality using the  
214 Shapiro-Wilk test. Friedman's test with Dunn's post-test was used to compare  
215 lymphoproliferation rates. The Mann-Whitney test was used to compare results among groups.  
216 Values were considered significant when  $p < 0.05$ .

217

## 218 **3. Results**

### 219 **3.1 Cloning and production of rcasIL-10R1**

220 Initially, the amino acid sequence of the extra-cytoplasmic domain of canine IL-10  
221 receptor alpha chain (R1) (casIL-10R1) was identified. This was carried out by comparing the  
222 entire canine IL-10R1 predicted protein (Genbank accession number XM\_005620306.1), full-  
223 length human IL-10R1 (GeneBank, accession number NM\_001558) and, human IL-10R1 extra-  
224 cytoplasmic domain [41] using the Basic Local Align Search Tool (BLAST,  
225 <https://blast.ncbi.nlm.nih.gov/Blast.cgi>). In addition, canine IL-10R1 extra-cytoplasmic domain  
226 was confirmed by analyzing full-length human and canine IL-10R1 using an online tool  
227 <https://tmdas.bioinfo.se/DAS/>. This analysis revealed all domains (protein signal peptide, extra-  
228 cytoplasmic, transmembrane, intracytoplasmic) of the human protein and allowed us to infer  
229 the corresponding domains in the canine sequence (Fig. 1), therefore, allowing identification of  
230 canine extra-cytoplasmic domain. CasIL-10R1 was defined as an array of 215 amino acids which  
231 exhibited 74% similarity to homologous region of human protein. Molecular weight and  
232 isoelectric point predicted for mature rcasIL-10R1 were 25.7 kDa and PI 8.3, respectively. A DNA  
233 construct was synthesized to encode in tandem the AcMNPV GP64 signal peptide, casIL-10R1,  
234 and a 6-histidine tag. RcasIL-10R1 was purified from supernatant of High-five cells infected with  
235 the recombinant baculovirus by affinity chromatography. Purified rcasIL-10R1 showed one  
236 strong and two weak bands of 40, 28 and 23 kDa in SDS-PAGE, respectively (Fig. 2A), however  
237 only the highest band was detected using anti-histidine antibodies by Western blotting (Fig. 2B).  
238 The yield of the purified rcasIL-10R1 was 2.8 mg/L of High-five cell culture and the endotoxin  
239 concentration was less than 0.03 EU/mg of protein. Together, these data indicate that the  
240 recombinant protein was successfully produced.

241

### 242 **3.2 Evaluation of binding between rcasIL-10R1 and canine IL-10**

243 To assess binding between canine rcasIL-10R1 and IL-10, rcasIL-10R1 was covalently  
244 immobilized to carboxymethylated dextran matrix (CM5 chip) activated by EDC/NHS to achieve  
245 1000 resonance response units (RU) in a Biacore T100 device. After blocking the remaining  
246 reactive chemical groups on the matrix, two samples of either PBS containing 1% BSA and 0.05%  
247 Tween 20 (to determine the baseline signal), various concentrations of canine IL-4 (cytokine  
248 irrelevant to the system, negative control) or various canine concentrations of IL-10, were  
249 applied on the matrix and RU readings were taken, and  $X \pm SD$  of RU were calculated from them.  
250 When samples of PBS containing 1% BSA and 0.05% Tween 20 or IL-4 in concentrations of 125,  
251 250 or 500 ng/ml were applied to the matrix,  $1.0 \pm 1.2$ ,  $17 \pm 6$ ,  $15.1 \pm 4.4$ , and  $510 \pm 132$  RU were  
252 observed, respectively (Fig. 3). On the other hand, when samples of canine IL-10 were applied,  
253 there was a progressive increase in signal starting at  $211 \pm 52$  RU for 31.2 ng/mL and reaching a  
254 plateau at  $1720 \pm 352$  RU for 125 ng/mL, indicating a strong binding between rcasIL-10R1 and  
255 IL-10 (Fig. 3). Binding equilibrium constant ( $EC_{80}$ ) between rcasIL-10R1 and IL-10 was determined  
256 as 51.4 nM.

257

### 258 **3.3 RcasIL-10R1 inhibits proliferation of MC/9 cells stimulated with IL-4 and IL-10**

259 Previously, Thompson-Snipes et al. (1991) [46], showed that MC/9 cells proliferate after  
260 dual stimulation with IL-10 and IL-4. To determine if rcasIL-10R1 was able to interfere with  
261 signaling by canine IL-10, MC/9 cells were cultured for 48 h in: a) complete DMEM (negative  
262 control) or complete DMEM with either b) 1.25% of supernatant from Con-A-stimulated rat  
263 splenocytes (positive control), c) rcalL-4 (180 ng/mL), d) rcalL-10 (20 ng/mL), e) rcalL-4 180  
264 ng/mL and rcalL-10 at 20 ng/mL, and f) rcalL-4 (180 ng/mL), rcalL-10 (20 ng/mL) and rcasIL-10R1  
265 (4  $\mu$ g/mL). Then, Alamar Blue was added to cell cultures and, after 24 h, optical density  
266 (difference in measurements at 570 nm and 600 nm,  $OD_{570-600nm}$ ), which correlates with the  
267 number of cells in wells, was determined. MC/9 cells cultured in medium alone or medium  
268 containing supernatant from Con-A-stimulated rat splenocytes revealed  $OD_{570-600nm}$  values  
269 ( $X \pm SD$ ) of  $0.138 \pm 0.014$  and  $0.465 \pm 0.020$ , respectively (Fig. 4). MC/9 cells stimulated with both  
270 rcalL-4 and rcalL-10 in the presence of rcasIL-10R1 exhibited lower  $OD_{570-600nm}$  values ( $0.313 \pm$   
271  $0.039$ ), as compared to cells activated in the absence rcasIL-10R1 ( $0.455 \pm 0.042$ ), suggesting  
272 that rcasIL-10R1 partially inhibited cell proliferation by blocking IL-10 signaling.

273

### 274 **3.4 RcasIL-10R1 induces peripheral blood lymphocyte proliferation in dogs with leishmaniasis** 275 **caused by *Leishmania infantum***

276 Dogs with leishmaniasis exhibit limited specific-cellular immune response and increase  
277 in IL-10 production [34, 47], to determine if blocking IL-10 signaling would revert *Leishmania-*



278 specific lymphoproliferative unresponsiveness, CFSE labeled-PBMCs from healthy or infected  
279 dogs were cultured together with, or without, rcasIL-10R1, and with or without the addition of  
280 SLA, or in the presence of PHA alone for five days. The Mean Fluorescence Intensities (MFI) of  
281 CFSE-labeled lymphocytes was determined under each condition. Reductions in CFSE-  
282 fluorescence were considered an indicator of cell proliferation [48]. The data described herein  
283 was previously reported in the context of testing combinations of several recombinant canine  
284 proteins [45]. In healthy dogs, lymphoproliferation was observed when PBMCs were cultured  
285 with PHA (median, interquartile 25, and 75, 256, 176, and 337) (Fig 5A), as compared with  
286 medium alone (101, 82, and 225). In diseased dogs, although CFSE-labeled lymphocytes cultured  
287 with PHA showed reductions in MFI, these were not statistically significant (Fig 1B). Lymphocytes  
288 from diseased dogs showed proliferative response when cultured with rcasIL-10R1, regardless  
289 of the addition of SLA to cultures (without SLA addition, rcasIL-10R1: 2.9, 2.0, and 10.2 vs  
290 medium: 128, 117, and 205; with SLA addition, rcasIL-10R1: 3.8; 1.3, and 12.1 vs medium: 121,  
291 87, and 176) (Fig 5B). These results suggest that blocking IL-10 signaling using rcasIL-10R1  
292 restores specific lymphoproliferative response in dogs with leishmaniasis.

293

#### 294 **4 Discussion**

295 IL-10 can restrict exaggerated inflammatory and immune responses, thus preventing  
296 tissue damage and promoting homeostasis [5, 6, 9]. However, by downregulating these  
297 responses, IL-10 may favor the development and/or persistence of chronic infections [49-51].  
298 Therefore, blocking IL-10 signaling may contribute to the establishment of adequate immune  
299 responses for the treatment of chronic infections [37, 49, 52]. Blocking IL-10 signaling can also  
300 be useful in immunization protocols that aim to induce immune responses against intracellular  
301 pathogens [49, 53].

302 IL-10 signaling can be blocked *in vitro* by the use of IL-10 or IL-10R reactive molecules,  
303 including antibodies, oligonucleotide or peptide aptamers, as well as soluble IL-10 receptor [39,  
304 41, 52, 54-56]. However, to date, only blocking antibodies to canine IL-10 or IL-10R have been  
305 developed (<https://www.rndsystems.com> R&D Systems), [38]. Such antibodies were produced  
306 in mice or goats, therefore, their administration in dogs could result in humoral responses to  
307 heterologous proteins [57], that would limit their use as blocking agents to IL-10 signaling in  
308 these animals.

309 The present work endeavored to identify the canine casIL-10R1 amino acid sequence,  
310 generate a recombinant baculovirus chromosome encoding this molecule, which was expressed  
311 in insect cells and subsequently purified to obtain rcasIL-10R1. In addition, rcasIL-10R1 was  
312 evaluated with respect to its binding ability and blocking of the homologous IL-10 signaling

313 pathway, as well as promoting lymphoproliferation in dogs with leishmaniasis caused by *L.*  
314 *infantum*.

315 Initially, casIL-10R1 was identified by comparing the amino acid sequences of calL-10R1,  
316 hull-10R1, husIL-10R1, and then detecting the extracellular domains in the first two proteins  
317 using an online tool for transmembrane domain prediction. Next, a DNA construct encoding  
318 casIL-10R1 was synthesized and transferred to a baculovirus artificial chromosome used to  
319 produce the protein in High five cells. Chromatographic affinity protein purification from cell  
320 culture supernatants indicated an adequate yield, reaching 2.6 mg/L. The generated  
321 recombinant protein presented a high degree of purity, as evidenced by a main band of 42 kDa  
322 when evaluated on SDS-PAGE and Western blotting assays. Since the predicted molecular  
323 weight of rcasIL-10R1 was 28 kDa, and considering its six canonical N-linked glycosylation  
324 motives (NXS / T), it follows that the protein must have been produced in a heavily glycosylated  
325 form. Similarly, a discrepancy was noted between the predicted molecular weight (24 kDa) and  
326 relative mobility (35-45 kDa) of rhusIL-10R1 produced in myeloma cells on SDS-PAGE analysis  
327 [41]. Moreover, these authors reported that treatment with N-glycanase promoted a reduction  
328 in molecular weight back to 24 kDa, indicating that the produced rhusIL-10R1 was highly  
329 glycosylated [41]. In addition, our analysis of the purified protein in solution presented a low  
330 concentration of endotoxin [58].

331 To assess its binding ability, rcasIL-10R1 was immobilized on a dextran matrix and  
332 resonance was recorded following the application of different concentrations of canine IL-10. In  
333 comparison to diluent alone or canine IL-4 (negative control), much higher resonance values  
334 were observed for IL-10, indicating specific binding between rcasIL-10R1 and IL-10. The  
335 equilibrium constant (EC80) concentration was determined to be 51.4 nM. In a previous report,  
336 the established equilibrium constant (EC50) for human IL-10 and hus-IL-10R1 binding was 0.47  
337 nM [59], which is much lower than that found herein. These observed discrepancies can be at  
338 least partially attributed to divergencies in the experimental conditions used, including the use  
339 of EC80 and native dimeric IL-10 in our protocols in comparison to EC50 and a mutated  
340 monomeric protein, in addition to differences in the methods of immobilization employed.

341 In combination with IL-4 and/or IL-3, IL-10 has been shown to induce mast cell  
342 proliferation [46], as demonstrated by growth in the mouse mast cell line (MC/9) through the  
343 concomitant stimulation of homologous IL-4 and IL-10. Moreover, MC/9 cells and a subcloned  
344 line, so-called MC/9.2, which expresses a lower amount of growth factor mRNA [60], have been  
345 used by several authors and biotechnology companies to demonstrate the functional activity of  
346 IL-10 in many animal species [46, 61-63], including *Canis familiaris*  
347 (<https://www.rndsystems.com/> R&D systems catalog number 735-CL-010 data sheet). To test

348 the ability of rcasIL-10R1 in the blockade of the cognate signaling pathway, MC/9 cells were  
349 stimulated with canine IL-10 and IL-4 in the presence or absence of rcasIL-10R1 (4 µg/mL). In the  
350 presence of the recombinant protein, an incomplete reduction was observed in the proliferation  
351 of MC/9 cells, indicating the partial blocking of this signaling pathway. Tan et al. (1995) [41]  
352 showed that 15-20 nM of rhusIL-10R1 induced a 50 % inhibition in the maximal proliferation of  
353 Ba8.1 cells (murine pro-B lymphocytes transfected with the gene encoding huIL-10R1) under  
354 stimulation with human IL-10 at 100 pM. In the present study, rcasIL-10R1 (95 nM) was found  
355 to promote a 30% reduction in the proliferation of MC/9 cells stimulated with 6 nM of canine IL-  
356 10.

357 Dogs naturally infected with *L. infantum* that remain asymptomatic have been shown to  
358 mount a specific lymphoproliferative response. However, dogs that succumb to the disease  
359 evolve with T cell exhaustion, involving both CD4+ and CD8+ T lymphocytes [34, 47], which  
360 implies the loss of these cells' ability to perform effector functions. One of the first functions lost  
361 due to this exhaustion is the capacity of lymphocytes to proliferate intensely under antigenic  
362 stimulation [64]. In the current study, the blocking of IL-10 signaling with rcasIL-10R1 for 5 days  
363 in infected canine PBMCs, under stimulation or not by SLA, resulted in the restoration of a  
364 lymphoproliferative response. Since *Leishmania* DNA was detected in the peripheral blood of  
365 these dogs, the observed lymphoproliferation was quite likely specific. By contrast, Esch et al.,  
366 (2013) [47] carried out assays in PBMCs from dogs with leishmaniasis caused by *L. infantum* to  
367 evaluate the impact of blocking IL-10 signaling with anti-IL-10 antibodies. In these assays, the  
368 authors assessed the percentage of T CD4 or T CD8 lymphocytes that incorporated EdU (5-  
369 ethynyl-2'-deoxyuridine) at 7 days of culture after stimulation with *Leishmania* antigens in the  
370 presence of anti-IL-10 antibodies or an isotype control. They observed no increases in the  
371 percentages of either CD4 or CD8 T lymphocytes after the blockade of IL-10 signaling, suggesting  
372 the absence of lymphocyte proliferation. The discrepancies between these authors' results and  
373 those herein likely occurred due to differences in the methodology used to evaluate lymphocyte  
374 proliferation. In consonance with our results, the blocking of this signaling cascade with anti-IL-  
375 10 antibodies in PBMCs from human patients with visceral leishmaniasis using a method similar  
376 to that employed herein was also shown to result in lymphoproliferation [65].

377 Future investigations designed to determine the conditions in which rcasIL-10R1 would  
378 block IL-10 in vivo in a wider context will be of great scientific interest, and could be applied to  
379 induce a Th1 immune response in the development of vaccines and immunotherapeutic  
380 protocols against chronic infection and cancer in dogs.

381

382 **5 Conclusion**

383 The rcasIL-10R1 produced in this baculovirus-insect cell system demonstrated the  
384 blockade of the IL-10 signaling pathway and the restoration of a lymphoproliferative response  
385 in dogs with leishmaniasis caused by *L. infantum*.

386

#### 387 Acknowledgments

388 The authors would like to thank Elivani Sacramento for helping with the experiments.  
389 The authors also thank the following institutions for their financial support: the National Council  
390 for Scientific and Technological Development (CNPq) process #400063/2016-6, (CNPq)/INCT-DT,  
391 process #573839/2008-5, and CNPq-PROEP, process #400913/2013-5 and the São Paulo  
392 Research Foundation (FAPESP), process #2017/10906-8. This study was financed in part by the  
393 Coordination for the Improvement of Higher Education Personnel (CAPES) - Finance Code 001  
394 (students financed: SFC, JMFM, CGMP) and FAPESB-FIOCRUZ PIBIC program. (FSS). Finally, the  
395 authors are grateful to the Program for Technological Development in Tools for Health (PDTIS-  
396 FIOCRUZ) for the use of its facilities and to the Postgraduate Course in Biotechnology in Health  
397 and Investigative Medicine. The funders had no role in study design, data collection and analysis,  
398 decision to publish, or preparation of the manuscript.

399

#### 400 Competing Interests

401 The authors have declared that no competing interests exist.

402

#### 403 References

404

- 405 1. Abbas AK, Lichtman AH, Pillai S, Baker DL, Baker A: **Immune receptors and signal**  
406 **transduction**. In: *Cellular and molecular immunology*. 9th edn. Philadelphia: Elsevier;  
407 2018.
- 408 2. Cavaillon JM: **Pro- versus anti-inflammatory cytokines: myth or reality**. *Cell Mol Biol*  
409 *(Noisy-le-grand)* 2001, **47**(4):695-702.
- 410 3. Boshtam M, Asgary S, Kouhpayeh S, Shariati L, Khanahmad H: **Aptamers Against Pro-**  
411 **and Anti-Inflammatory Cytokines: A Review**. *Inflammation* 2017, **40**(1):340-349.
- 412 4. Zhang JM, An J: **Cytokines, inflammation, and pain**. *Int Anesthesiol Clin* 2007, **45**(2):27-  
413 37.
- 414 5. Gabrysova L, Howes A, Saraiva M, O'Garra A: **The regulation of IL-10 expression**. *Current*  
415 *topics in microbiology and immunology* 2014, **380**:157-190.
- 416 6. Saraiva M, Vieira P, O'Garra A: **Biology and therapeutic potential of interleukin-10**. *J*  
417 *Exp Med* 2020, **217**(1).
- 418 7. Pletnev S, Magracheva E, Wlodawer A, Zdanov A: **A model of the ternary complex of**  
419 **interleukin-10 with its soluble receptors**. *BMC structural biology* 2005, **5**:10.
- 420 8. Walter MR: **The molecular basis of IL-10 function: from receptor structure to the onset**  
421 **of signaling**. *Current topics in microbiology and immunology* 2014, **380**:191-212.
- 422 9. Moore KW, de Waal Malefyt R, Coffman RL, O'Garra A: **Interleukin-10 and the**  
423 **interleukin-10 receptor**. *Annu Rev Immunol* 2001, **19**:683-765.

- 424 10. Shouval DS, Biswas A, Goettel JA, McCann K, Conaway E, Redhu NS, Mascanfroni ID, Al  
425 Adham Z, Lavoie S, Ibourk M *et al*: **Interleukin-10 receptor signaling in innate immune**  
426 **cells regulates mucosal immune tolerance and anti-inflammatory macrophage**  
427 **function.** *Immunity* 2014, **40**(5):706-719.
- 428 11. Zigmund E, Bernshtein B, Friedlander G, Walker CR, Yona S, Kim KW, Brenner O,  
429 Krauthgamer R, Varol C, Muller W *et al*: **Macrophage-restricted interleukin-10 receptor**  
430 **deficiency, but not IL-10 deficiency, causes severe spontaneous colitis.** *Immunity* 2014,  
431 **40**(5):720-733.
- 432 12. D'Andrea A, Aste-Amezaga M, Valiante NM, Ma X, Kubin M, Trinchieri G: **Interleukin 10**  
433 **(IL-10) inhibits human lymphocyte interferon gamma-production by suppressing**  
434 **natural killer cell stimulatory factor/IL-12 synthesis in accessory cells.** *J Exp Med* 1993,  
435 **178**(3):1041-1048.
- 436 13. de Waal Malefyt R, Abrams J, Bennett B, Figdor CG, de Vries JE: **Interleukin 10(IL-10)**  
437 **inhibits cytokine synthesis by human monocytes: an autoregulatory role of IL-10**  
438 **produced by monocytes.** *J Exp Med* 1991, **174**(5):1209-1220.
- 439 14. Fiorentino DF, Zlotnik A, Mosmann TR, Howard M, O'Garra A: **IL-10 inhibits cytokine**  
440 **production by activated macrophages.** *J Immunol* 1991, **147**(11):3815-3822.
- 441 15. Gruber MF, Williams CC, Gerrard TL: **Macrophage-colony-stimulating factor expression**  
442 **by anti-CD45 stimulated human monocytes is transcriptionally up-regulated by IL-1**  
443 **beta and inhibited by IL-4 and IL-10.** *J Immunol* 1994, **152**(3):1354-1361.
- 444 16. Creery WD, Diaz-Mitoma F, Filion L, Kumar A: **Differential modulation of B7-1 and B7-2**  
445 **isoform expression on human monocytes by cytokines which influence the**  
446 **development of T helper cell phenotype.** *Eur J Immunol* 1996, **26**(6):1273-1277.
- 447 17. Ding L, Shevach EM: **IL-10 inhibits mitogen-induced T cell proliferation by selectively**  
448 **inhibiting macrophage costimulatory function.** *J Immunol* 1992, **148**(10):3133-3139.
- 449 18. Willems F, Marchant A, Delville JP, Gerard C, Delvaux A, Velu T, de Boer M, Goldman M:  
450 **Interleukin-10 inhibits B7 and intercellular adhesion molecule-1 expression on human**  
451 **monocytes.** *Eur J Immunol* 1994, **24**(4):1007-1009.
- 452 19. Capsoni F, Minonzio F, Ongari AM, Carbonelli V, Galli A, Zanussi C: **IL-10 up-regulates**  
453 **human monocyte phagocytosis in the presence of IL-4 and IFN-gamma.** *J Leukoc Biol*  
454 1995, **58**(3):351-358.
- 455 20. Spittler A, Schiller C, Willheim M, Tempfer C, Winkler S, Boltz-Nitulescu G: **IL-10**  
456 **augments CD23 expression on U937 cells and down-regulates IL-4-driven CD23**  
457 **expression on cultured human blood monocytes: effects of IL-10 and other cytokines**  
458 **on cell phenotype and phagocytosis.** *Immunology* 1995, **85**(2):311-317.
- 459 21. Bogdan C, Vodovotz Y, Nathan C: **Macrophage deactivation by interleukin 10.** *J Exp Med*  
460 1991, **174**(6):1549-1555.
- 461 22. Cunha FQ, Moncada S, Liew FY: **Interleukin-10 (IL-10) inhibits the induction of nitric**  
462 **oxide synthase by interferon-gamma in murine macrophages.** *Biochem Biophys Res*  
463 *Commun* 1992, **182**(3):1155-1159.
- 464 23. Kuga S, Otsuka T, Nihiro H, Nunoi H, Nemoto Y, Nakano T, Ogo T, Umei T, Niho Y:  
465 **Suppression of superoxide anion production by interleukin-10 is accompanied by a**  
466 **downregulation of the genes for subunit proteins of NADPH oxidase.** *Exp Hematol*  
467 1996, **24**(2):151-157.
- 468 24. Macatonia SE, Doherty TM, Knight SC, O'Garra A: **Differential effect of IL-10 on dendritic**  
469 **cell-induced T cell proliferation and IFN-gamma production.** *J Immunol* 1993,  
470 **150**(9):3755-3765.
- 471 25. Del Prete G, De Carli M, Almerigogna F, Giudizi MG, Biagiotti R, Romagnani S: **Human IL-**  
472 **10 is produced by both type 1 helper (Th1) and type 2 helper (Th2) T cell clones and**  
473 **inhibits their antigen-specific proliferation and cytokine production.** *J Immunol* 1993,  
474 **150**(2):353-360.

- 475 26. Groux H, Bigler M, de Vries JE, Roncarolo MG: **Interleukin-10 induces a long-term**  
476 **antigen-specific anergic state in human CD4+ T cells.** *J Exp Med* 1996, **184**(1):19-29.
- 477 27. Groux H, Bigler M, de Vries JE, Roncarolo MG: **Inhibitory and stimulatory effects of IL-**  
478 **10 on human CD8+ T cells.** *J Immunol* 1998, **160**(7):3188-3193.
- 479 28. Naing A, Infante JR, Papadopoulos KP, Chan IH, Shen C, Ratti NP, Rojo B, Autio KA, Wong  
480 DJ, Patel MR *et al*: **PEGylated IL-10 (Pegilodecakin) Induces Systemic Immune**  
481 **Activation, CD8(+) T Cell Invigoration and Polyclonal T Cell Expansion in Cancer**  
482 **Patients.** *Cancer Cell* 2018, **34**(5):775-791 e773.
- 483 29. Santin AD, Hermonat PL, Ravaggi A, Bellone S, Pecorelli S, Roman JJ, Parham GP, Cannon  
484 MJ: **Interleukin-10 increases Th1 cytokine production and cytotoxic potential in human**  
485 **papillomavirus-specific CD8(+) cytotoxic T lymphocytes.** *J Virol* 2000, **74**(10):4729-  
486 4737.
- 487 30. Lukes J, Mauricio IL, Schonian G, Dujardin JC, Soteriadou K, Dedet JP, Kuhls K, Tintaya  
488 KW, Jirku M, Chocholova E *et al*: **Evolutionary and geographical history of the**  
489 **Leishmania donovani complex with a revision of current taxonomy.** *Proc Natl Acad Sci*  
490 *U S A* 2007, **104**(22):9375-9380.
- 491 31. Walker DM, Oghumu S, Gupta G, McGwire BS, Drew ME, Satoskar AR: **Mechanisms of**  
492 **cellular invasion by intracellular parasites.** *Cell Mol Life Sci* 2014, **71**(7):1245-1263.
- 493 32. Baneth G, Koutinas AF, Solano-Gallego L, Bourdeau P, Ferrer L: **Canine leishmaniosis -**  
494 **new concepts and insights on an expanding zoonosis: part one.** *Trends Parasitol* 2008,  
495 **24**(7):324-330.
- 496 33. Solano-Gallego L, Koutinas A, Miro G, Cardoso L, Pennisi MG, Ferrer L, Bourdeau P, Oliva  
497 G, Baneth G: **Directions for the diagnosis, clinical staging, treatment and prevention of**  
498 **canine leishmaniosis.** *Vet Parasitol* 2009, **165**(1-2):1-18.
- 499 34. Boggiatto PM, Ramer-Tait AE, Metz K, Kramer EE, Gibson-Corley K, Mullin K, Hostetter  
500 JM, Gallup JM, Jones DE, Petersen CA: **Immunologic indicators of clinical progression**  
501 **during canine Leishmania infantum infection.** *Clin Vaccine Immunol* 2010, **17**(2):267-  
502 273.
- 503 35. do Nascimento PR, Martins DR, Monteiro GR, Queiroz PV, Freire-Neto FP, Queiroz JW,  
504 Morais Lima AL, Jeronimo SM: **Association of pro-inflammatory cytokines and iron**  
505 **regulatory protein 2 (IRP2) with Leishmania burden in canine visceral leishmaniasis.**  
506 *PLoS one* 2013, **8**(10):e73873.
- 507 36. Strauss-Ayali D, Baneth G, Shor S, Okano F, Jaffe CL: **Interleukin-12 augments a Th1-**  
508 **type immune response manifested as lymphocyte proliferation and interferon gamma**  
509 **production in Leishmania infantum-infected dogs.** *Int J Parasitol* 2005, **35**(1):63-73.
- 510 37. Brooks DG, Lee AM, Elsaesser H, McGavern DB, Oldstone MB: **IL-10 blockade facilitates**  
511 **DNA vaccine-induced T cell responses and enhances clearance of persistent virus**  
512 **infection.** *J Exp Med* 2008, **205**(3):533-541.
- 513 38. Cardoso JMdO: **Tratamento da leishmaniose visceral canina empregando duas**  
514 **abordagens terapêuticas distintas: quimioterapia com antimoniato de meglumina**  
515 **lipossomal e imunoterapia com anticorpo monoclonal bloqueador do receptor de IL-**  
516 **10.** 2018.
- 517 39. Diaz-Valdes N, Manterola L, Belsue V, Riezu-Boj JI, Larrea E, Echeverria I, Llopiz D, Lopez-  
518 Sagaseta J, Lerat H, Pawlotsky JM *et al*: **Improved dendritic cell-based immunization**  
519 **against hepatitis C virus using peptide inhibitors of interleukin 10.** *Hepatology* 2011,  
520 **53**(1):23-31.
- 521 40. Rigopoulou EI, Abbott WG, Haigh P, Naoumov NV: **Blocking of interleukin-10 receptor-**  
522 **a novel approach to stimulate T-helper cell type 1 responses to hepatitis C virus.**  
523 *Clinical immunology* 2005, **117**(1):57-64.
- 524 41. Tan JC, Braun S, Rong H, DiGiacomo R, Dolphin E, Baldwin S, Narula SK, Zavodny PJ, Chou  
525 CC: **Characterization of recombinant extracellular domain of human interleukin-10**  
526 **receptor.** *The Journal of biological chemistry* 1995, **270**(21):12906-12911.

- 527 42. Whitford M, Stewart S, Kuzio J, Faulkner P: **Identification and sequence analysis of a**  
528 **gene encoding gp67, an abundant envelope glycoprotein of the baculovirus**  
529 **Autographa californica nuclear polyhedrosis virus.** *J Virol* 1989, **63**(3):1393-1399.
- 530 43. Pinheiro CGM, Pedrosa Mde O, Teixeira NC, Ano Bom AP, van Oers MM, Oliveira GG:  
531 **Optimization of canine interleukin-12 production using a baculovirus insect cell**  
532 **expression system.** *BMC research notes* 2016, **9**:36.
- 533 44. USP (2011) Chapter, Bacterial Endotoxins Test) [Internet]. Available:  
534 [http://www.usp.org/harmonization-standards/pdg/general-methods/bacterial-](http://www.usp.org/harmonization-standards/pdg/general-methods/bacterial-endotoxins)  
535 [endotoxins.](http://www.usp.org/harmonization-standards/pdg/general-methods/bacterial-endotoxins)
- 536 45. Costa SF, Gomes VO, Dos Santos Maciel MO, Melo LM, Venturin GL, Bragato JP, Rebeck  
537 GT, de Oliveira Santos C, Nascimento de Oliveira BM, Gileno de Sa Oliveira G *et al*:  
538 **Combined in vitro IL-12 and IL-15 stimulation promotes cellular immune response in**  
539 **dogs with visceral leishmaniasis.** *PLoS Negl Trop Dis* 2020, **14**(1):e0008021.
- 540 46. Thompson-Snipes L, Dhar V, Bond MW, Mosmann TR, Moore KW, Rennick DM:  
541 **Interleukin 10: a novel stimulatory factor for mast cells and their progenitors.** *J Exp*  
542 *Med* 1991, **173**(2):507-510.
- 543 47. Esch KJ, Juelsgaard R, Martinez PA, Jones DE, Petersen CA: **Programmed death 1-**  
544 **mediated T cell exhaustion during visceral leishmaniasis impairs phagocyte function.** *J*  
545 *Immunol* 2013, **191**(11):5542-5550.
- 546 48. Lyons AB, Parish CR: **Determination of lymphocyte division by flow cytometry.** *Journal*  
547 *of immunological methods* 1994, **171**(1):131-137.
- 548 49. Wilson EB, Brooks DG: **The role of IL-10 in regulating immunity to persistent viral**  
549 **infections.** *Current topics in microbiology and immunology* 2011, **350**:39-65.
- 550 50. Zijlstra EE: **The immunology of post-kala-azar dermal leishmaniasis (PKDL).** *Parasit*  
551 *Vectors* 2016, **9**:464.
- 552 51. Bunn PT, Montes de Oca M, de Labastida Rivera F, Kumar R, Ng SS, Edwards CL, Faleiro  
553 RJ, Sheel M, Amante FH, Frame TCM *et al*: **Distinct Roles for CD4(+) Foxp3(+) Regulatory**  
554 **T Cells and IL-10-Mediated Immunoregulatory Mechanisms during Experimental**  
555 **Visceral Leishmaniasis Caused by Leishmania donovani.** *J Immunol* 2018, **201**(11):3362-  
556 3372.
- 557 52. Murray HW, Lu CM, Mauze S, Freeman S, Moreira AL, Kaplan G, Coffman RL: **Interleukin-**  
558 **10 (IL-10) in experimental visceral leishmaniasis and IL-10 receptor blockade as**  
559 **immunotherapy.** *Infect Immun* 2002, **70**(11):6284-6293.
- 560 53. Clutton G, Bridgeman A, Reyes-Sandoval A, Hanke T, Dorrell L: **Transient IL-10 receptor**  
561 **blockade can enhance CD8(+) T cell responses to a simian adenovirus-vectored HIV-1**  
562 **conserved region immunogen.** *Hum Vaccin Immunother* 2015, **11**(4):1030-1035.
- 563 54. Naiyer MM, Saha S, Hemke V, Roy S, Singh S, Musti KV, Saha B: **Identification and**  
564 **characterization of a human IL-10 receptor antagonist.** *Human immunology* 2013,  
565 **74**(1):28-31.
- 566 55. Berezhnoy A, Stewart CA, McNamara JO, 2nd, Thiel W, Giangrande P, Trinchieri G, Gilboa  
567 E: **Isolation and optimization of murine IL-10 receptor blocking oligonucleotide**  
568 **aptamers using high-throughput sequencing.** *Molecular therapy : the journal of the*  
569 *American Society of Gene Therapy* 2012, **20**(6):1242-1250.
- 570 56. Ni G, Chen S, Yang Y, Cummins SF, Zhan J, Li Z, Zhu B, Mounsey K, Walton S, Wei MQ *et*  
571 *al*: **Investigation the Possibility of Using Peptides with a Helical Repeating Pattern of**  
572 **Hydro-Phobic and Hydrophilic Residues to Inhibit IL-10.** *PLoS one* 2016,  
573 **11**(4):e0153939.
- 574 57. Waldmann H: **Human Monoclonal Antibodies: The Benefits of Humanization.** *Methods*  
575 *Mol Biol* 2019, **1904**:1-10.
- 576 58. Magalhaes PO, Lopes AM, Mazzola PG, Rangel-Yagui C, Penna TC, Pessoa A, Jr.: **Methods**  
577 **of endotoxin removal from biological preparations: a review.** *J Pharm Pharm Sci* 2007,  
578 **10**(3):388-404.

- 579 59. Yoon SI, Logsdon NJ, Sheikh F, Donnelly RP, Walter MR: **Conformational changes**  
580 **mediate interleukin-10 receptor 2 (IL-10R2) binding to IL-10 and assembly of the**  
581 **signaling complex.** *The Journal of biological chemistry* 2006, **281**(46):35088-35096.
- 582 60. Burd PR, Rogers HW, Gordon JR, Martin CA, Jayaraman S, Wilson SD, Dvorak AM, Galli  
583 SJ, Dorf ME: **Interleukin 3-dependent and -independent mast cells stimulated with IgE**  
584 **and antigen express multiple cytokines.** *J Exp Med* 1989, **170**(1):245-257.
- 585 61. Asiedu C, Guarcello V, Deckard L, Jargal U, Gansuvd B, Acosta EP, Thomas JM: **Cloning**  
586 **and characterization of recombinant rhesus macaque IL-10/Fc(ala-ala) fusion protein:**  
587 **a potential adjunct for tolerance induction strategies.** *Cytokine* 2007, **40**(3):183-192.
- 588 62. Tan JC, Indelicato SR, Narula SK, Zavodny PJ, Chou CC: **Characterization of interleukin-**  
589 **10 receptors on human and mouse cells.** *The Journal of biological chemistry* 1993,  
590 **268**(28):21053-21059.
- 591 63. Imlach W, McCaughan CA, Mercer AA, Haig D, Fleming SB: **Orf virus-encoded**  
592 **interleukin-10 stimulates the proliferation of murine mast cells and inhibits cytokine**  
593 **synthesis in murine peritoneal macrophages.** *J Gen Virol* 2002, **83**(Pt 5):1049-1058.
- 594 64. Wherry EJ: **T cell exhaustion.** *Nat Immunol* 2011, **12**(6):492-499.
- 595 65. Ghalib HW, Piuvezam MR, Skeiky YA, Siddig M, Hashim FA, el-Hassan AM, Russo DM,  
596 Reed SG: **Interleukin 10 production correlates with pathology in human Leishmania**  
597 **donovani infections.** *J Clin Invest* 1993, **92**(1):324-329.

598

599 Figures

600 Figure legends

601 Fig. 1 Identification and design of DNA construct encoding soluble canine IL-10R1 production.  
602 Identification of the extra-cytoplasmic domain of canine IL-10 receptor alpha chain was  
603 performed by comparing the amino acid sequences of human (huIL-10R1, GeneBank, accession  
604 number NM\_001558) and canine (caIL-10R1, Genbank accession number XM\_005620306.1) IL-  
605 10 receptor alpha chain, and huIL-10R1, previously described by Tan et al. 1991, using Basic  
606 Local Align Search Tool, as well as defining signal peptide and transmembrane domains (TM)  
607 (defined by vertical bars) using an online tool (<https://tmdas.bioinfo.se/DAS/>) (Fig. 1A). The DNA  
608 construct was designed to encode the following elements in tandem: a) *Autographa californica*  
609 multiple nuclear polyhedrosis virus (AcMNPV) GP64 leader sequence, b) casIL-10R1, and c) six  
610 histidines (Fig. 1B).

611

612

613 Fig. 2 Evaluation of purified rcasIL-10R1 by SDS-PAGE and Western blot. RcasIL-10R1 was  
614 produced in High-five cells infected with the AcBac $\Delta$ cc-GP64-casIL-10R1-6H baculovirus  
615 construct at MOI 5 for 72 h. Then, rcasIL-10R1 was purified from cell-free and virus-free culture  
616 supernatant (SN) by Ni-Sepharose affinity chromatography column. Samples of purified protein  
617 were evaluated by SDS-PAGE (A): molecular weight markers (lane 1), cell culture SN applied to  
618 the chromatographic column (lane 2), flow through (lane 3), and purified protein (lane 4) or



619 Western blot developed by anti-his antibodies (B): SN from cells infected with baculovirus  
620 devoid of insert (negative control) (lane 1), SN from cells infected with AcBac $\Delta$ cc-GP64-casIL-  
621 10R1-6H baculovirus construct (lane 2) or sample of purified rcasIL-10R1. Arrows indicate a band  
622 around 42 kDa corresponding to rcasIL-10R1-6H.

623

624 Fig. 3 Evaluation of binding between rcasIL-10R1 and canine IL-10.

625 Purified rcasIL-10R1 was immobilized on a CM5 chip in a Biacore T100 analyzer by applying 800  
626  $\mu$ L of the recombinant protein (0.5  $\mu$ g/mL) at (50  $\mu$ L/minute) to the chip matrix activated by 1-  
627 Ethyl-3-(3-dimethylaminopropyl) carbodiimide hydrochloride (EDC)/N-Hydroxysuccinimide  
628 (NHS) to achieve 1000 resonance response units (RU). Then remaining reactive chemical groups  
629 on the chip were blocked by applying Ethanolamine hydrochloride-NaOH for one minute. The  
630 following samples were applied to the matrix for two minutes and 30 seconds: a) PBS containing  
631 1% BSA and 0.05 % Tween 20 (open triangle) ; b) canine IL-4 at 125, 250 or 500 ng/mL (open  
632 square); c) canine IL-10 at 31.2, 62.5, 125, 250 or 500 ng/ml (open circle). IL-4 and IL-10 were  
633 diluted with PBS containing 0.05% Tween 20. After each analyte binding evaluation, matrix  
634 regeneration was performed by applying regeneration buffer for 30 seconds. Each sample was  
635 evaluated twice and results are presented as means and standard deviations ( $X \pm SD$ ) of RU.

636

637 Fig 4. Blocking canine IL-10 signaling by rcasIL-10R1 reduces MC/9 cell proliferation. The murine  
638 mast cell line MC/9 was cultured at  $1 \times 10^5$ /mL in triplicate wells (100  $\mu$ L/well) on a 96-well flat-  
639 bottomed microtiter plate with: a) complete DMEM alone (negative control) or complete DMEM  
640 containing: b) 0.625% of supernatant from Con-A-stimulated rat splenocytes (Con-A-SRS, assay  
641 positive control), c) rcaIL-4, 180 ng/mL, d) rcaIL-10, 20 ng/mL, e) rcaIL-4 (180 ng/mL) and rcaIL-  
642 10 (20 ng/mL), or f) rcaIL-4 (180 ng/mL), rcaIL-10 (20 ng/mL) and rcasIL-10R1 (4  $\mu$ g/mL). The  
643 plate was kept for 48 h under 5 % CO<sub>2</sub> at 37 °C. Then, 10  $\mu$ L of Alamar Blue were added to each  
644 well. Cells were cultured for an additional 24 hours and optical density (OD) was read at 570 nm  
645 and 600 nm wavelengths. Differences in mean OD values were used to estimate MC/9 cell  
646 proliferation rates. Symbols and bars represent replicates and means.

647

648

649 Fig 5. Blocking canine IL-10 signaling by rcasIL-10R1 restores specific lymphoproliferative  
650 response in dogs with VL. CFSE-labeled PBMCs from healthy negative control dogs (n=5) (A) and  
651 dogs with leishmaniasis (n=10) (B) were cultured in medium alone (Medium), medium with  
652 soluble Leishmania antigens (SLA) or phytohemagglutinin (PHA). In addition, PBMCs cultured in  
653 medium alone or with SLA were stimulated with rcasIL-10R1. After 5 days, the mean

654 fluorescence intensity (MFI) of CFSE-labeled lymphocytes was assessed by flow cytometry. Bars  
655 represent MFI median values and 25th and 75th percentile interquartile range. Symbols  
656 represent data from individual animals. Asterisks indicate significant differences (Friedman's  
657 test with Dunn's multiple comparison,  $p < 0.05$ ).

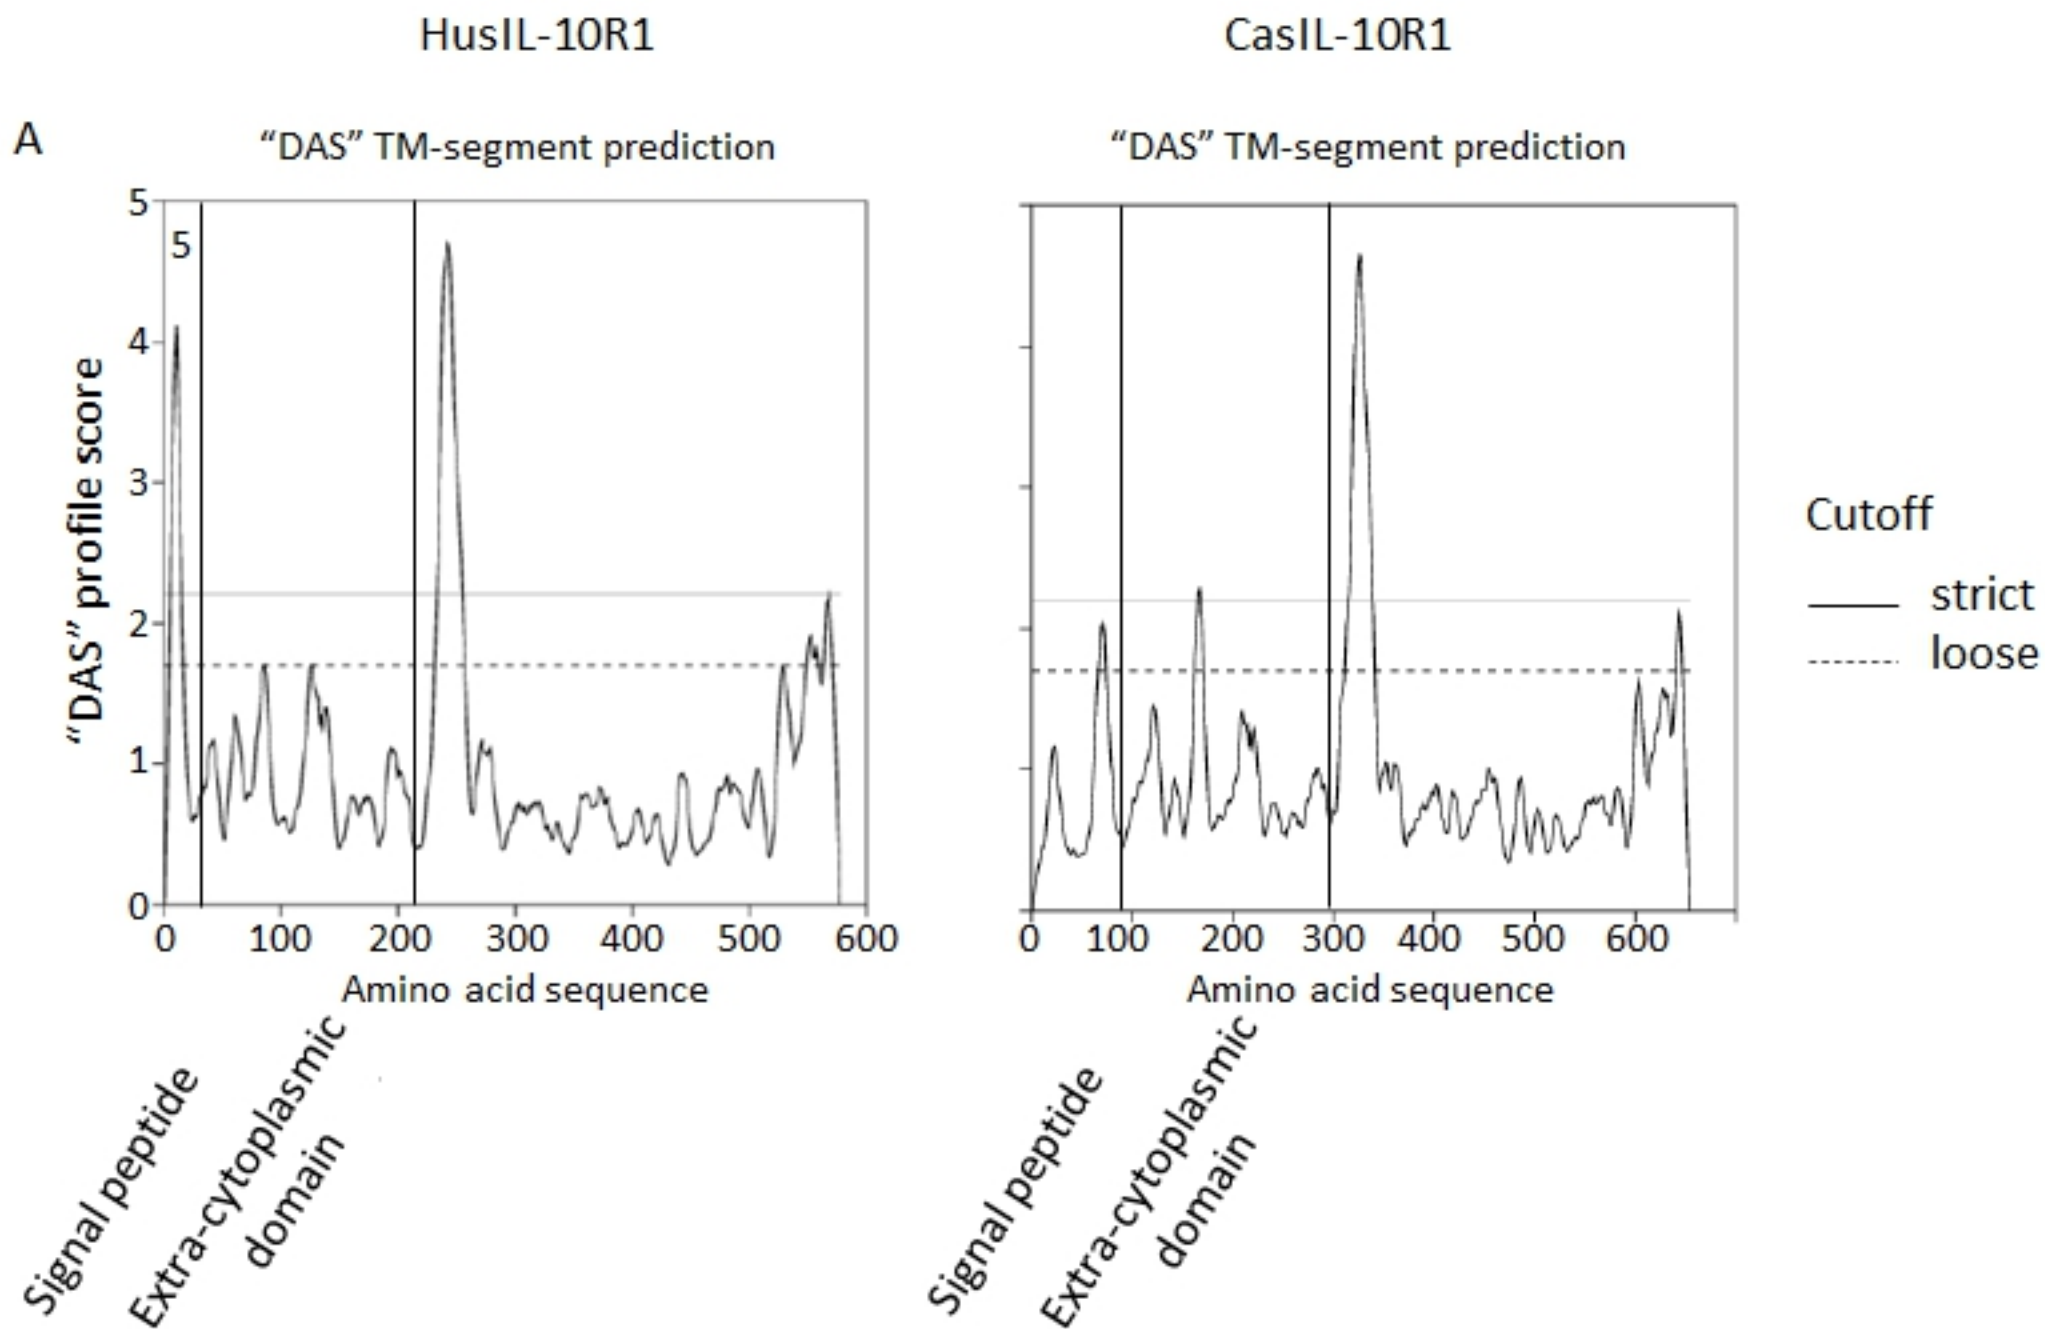

**B**

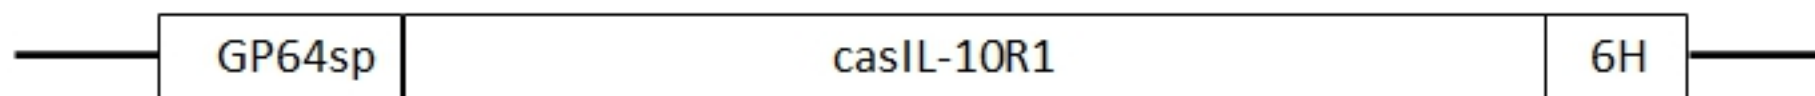

**Figure 1**

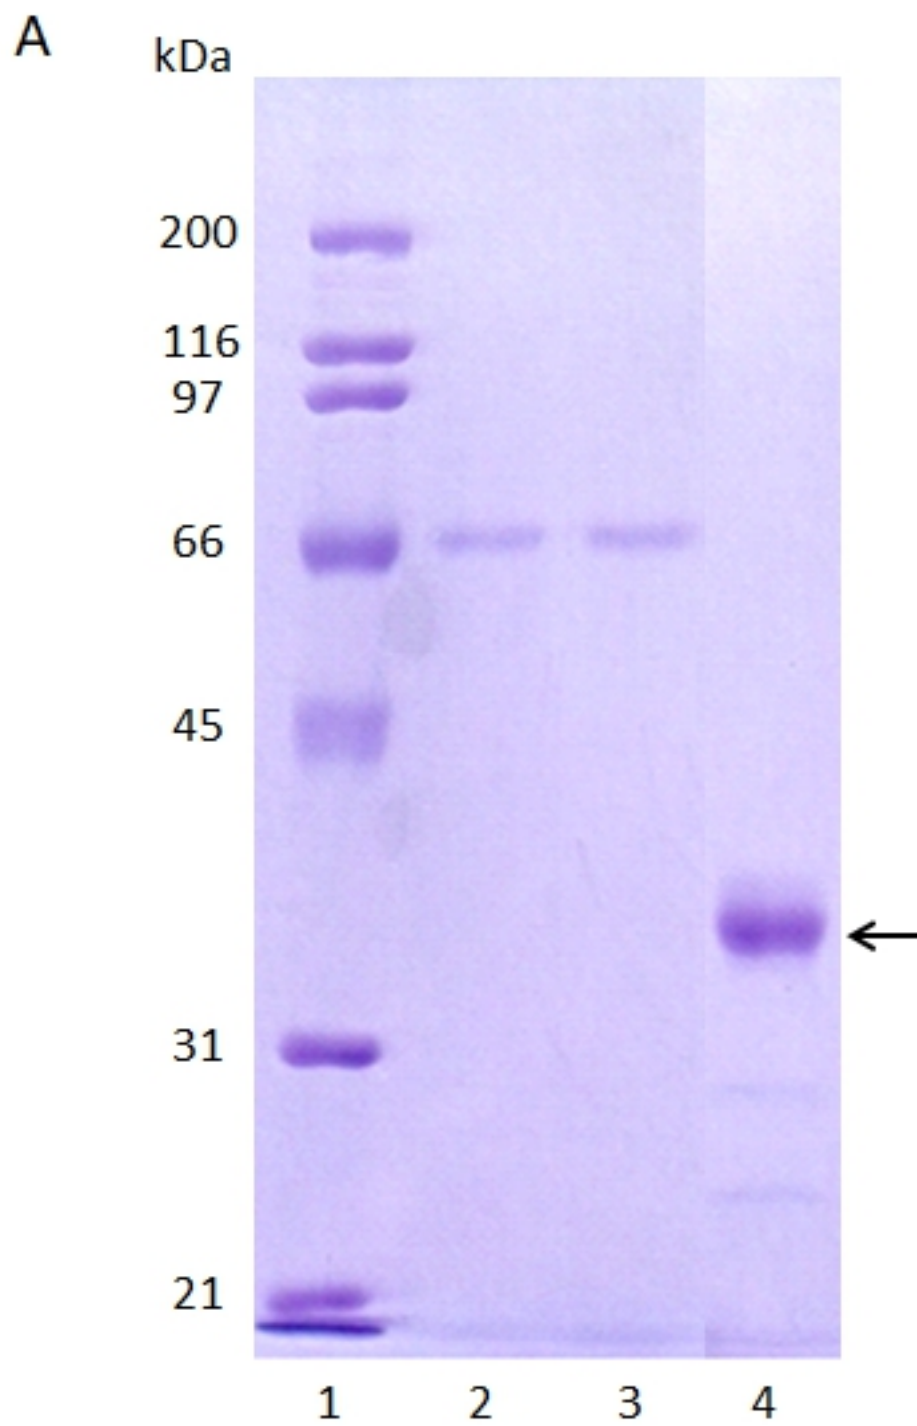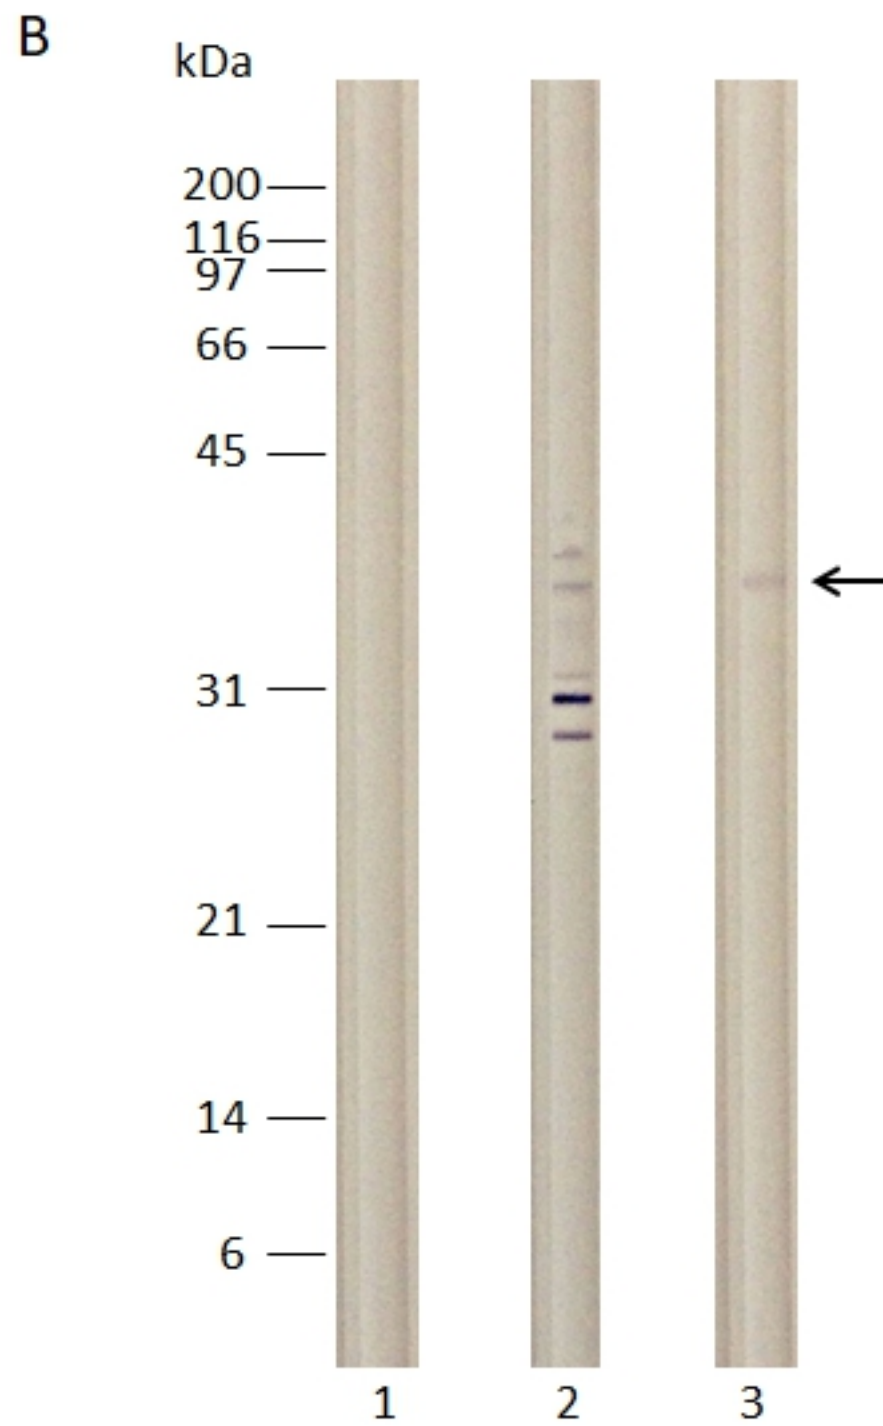

Figure 2

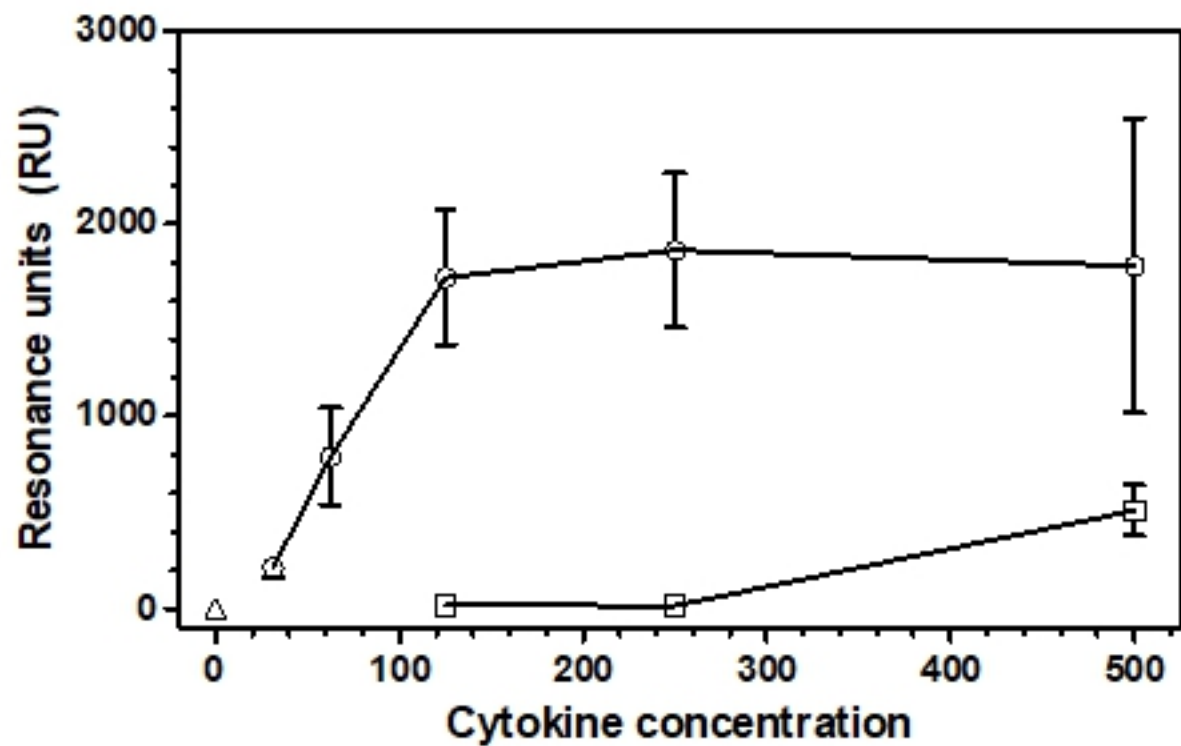

Figure 3

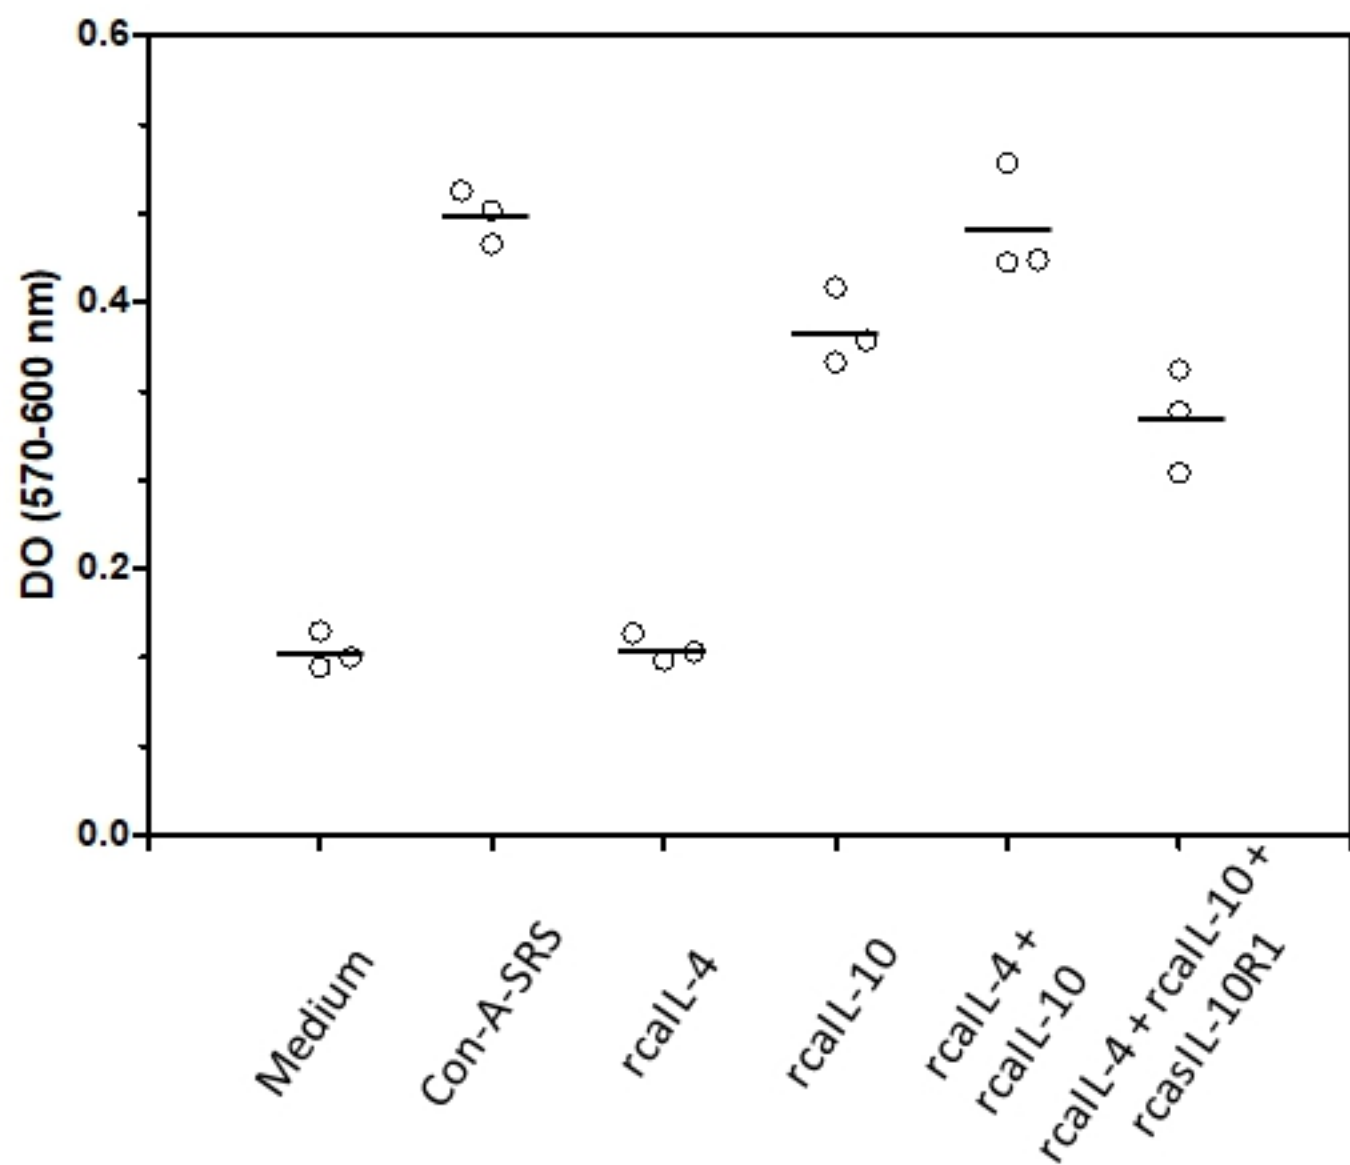

Figure 4

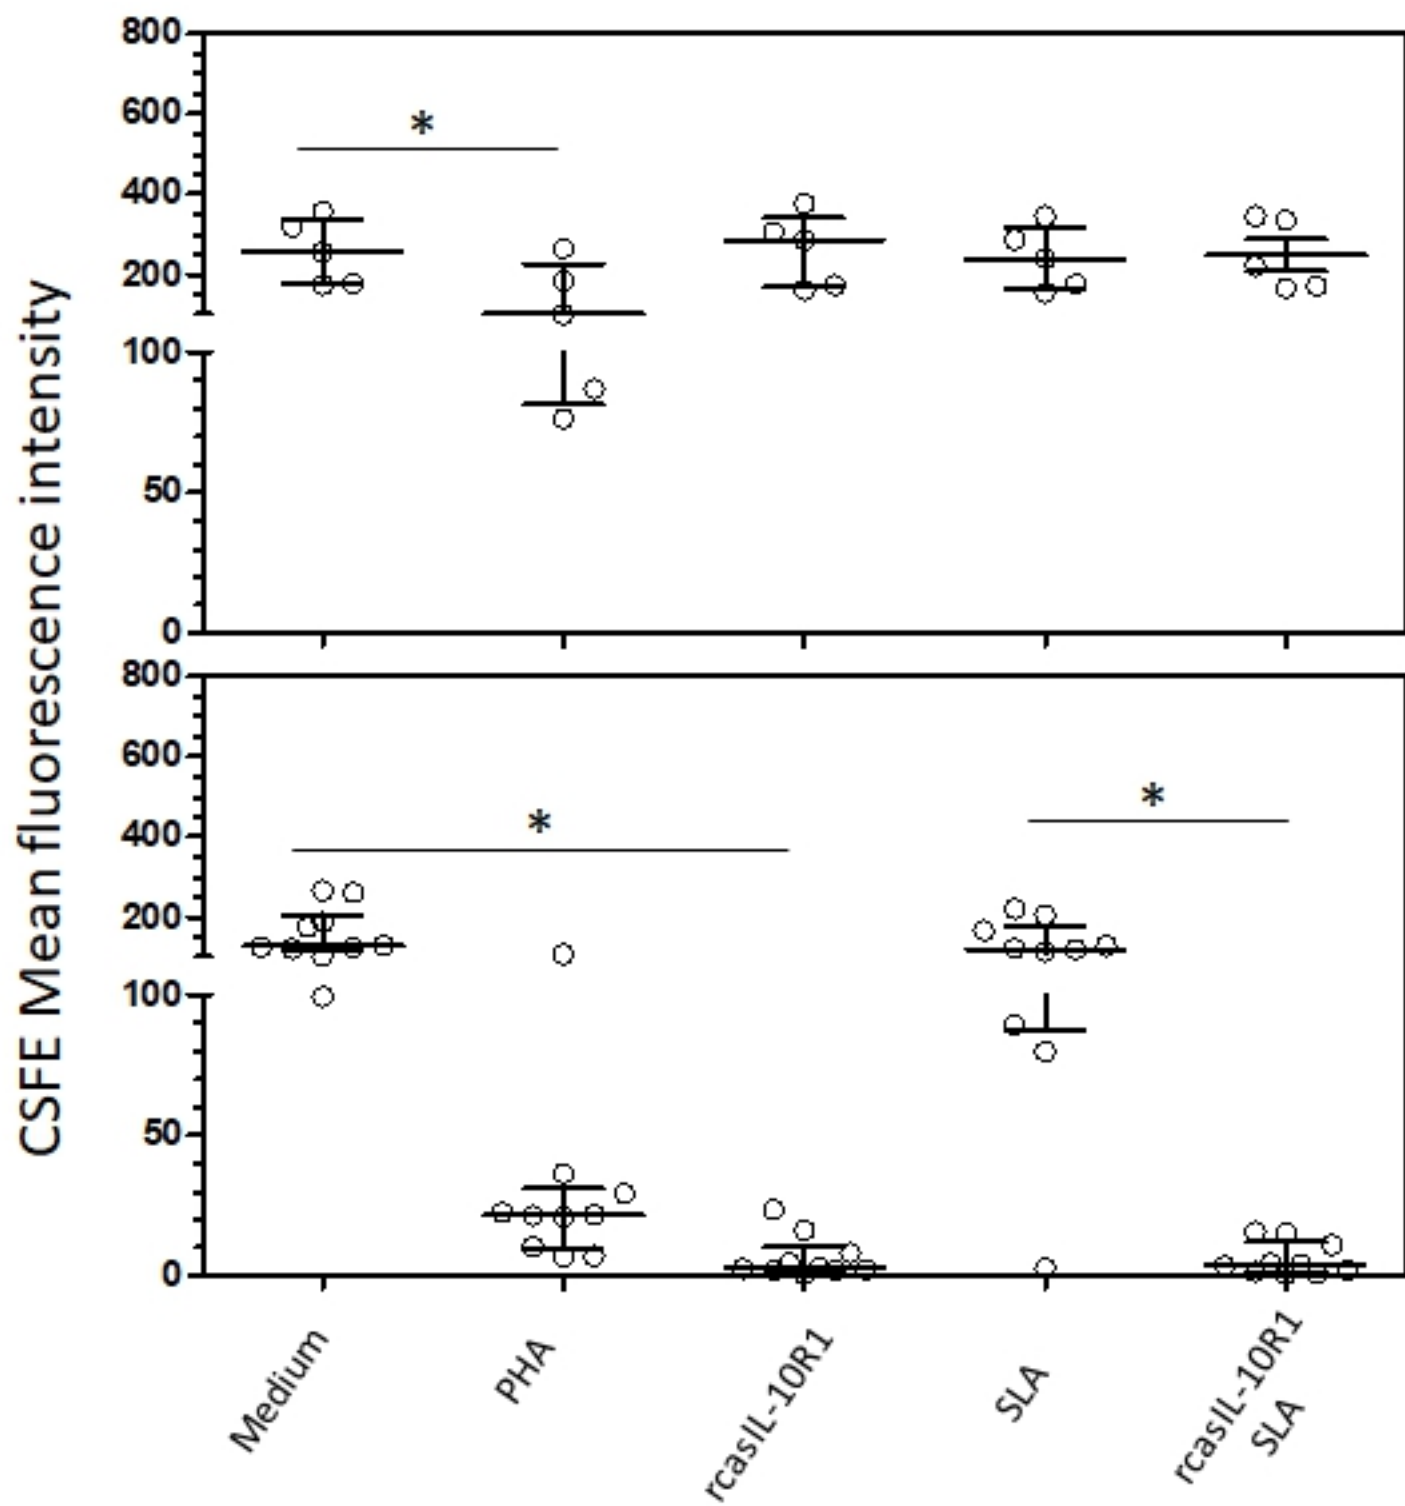

Figure 5
